# Supplementary material for: Global regulation of gene expression by OxyR in an important human opportunistic pathogen
Source: PubMed Central journal article supplement — Nucleic Acids Res. 2012 Jan 24;40(10):4320–33. doi: 10.1093/nar/gks017 (PMC3378865; doi:10.1093/nar/gks017), 2012-01-24
Supplement: supp_gks017_nar-02800-v-2011-File009.pdf [file supp_gks017_nar-02800-v-2011-File009.pdf]

**Table S1. Whole-genome location analysis of OxyR in *Pseudomonas aeruginosa* (Cutoff > 0.5)**

| PA no. <sup>a</sup> | Gene <sup>a</sup> | ChIP-chip    |                 |                | Binding motif                |                              |                        | Gene product <sup>a</sup>                                 |
|---------------------|-------------------|--------------|-----------------|----------------|------------------------------|------------------------------|------------------------|-----------------------------------------------------------|
|                     |                   | Max. Enrich. | Distance to ATG | Genes affected | Conserved motif <sup>b</sup> | Distance to ATG <sup>b</sup> | PMW score <sup>b</sup> |                                                           |
| PA0139              | <i>ahpC</i>       | 1.72         | 171             | 1              | ATAGATTTAGATAAT              | 101                          | 7.71                   | Alkyl hydroperoxide reductase subunit C                   |
| PA0140              | <i>ahpF</i>       | 1.72         | 127             | 1              |                              |                              |                        | Alkyl hydroperoxide reductase subunit F                   |
| PA0848              | <i>ahpB</i>       | 0.83         | -51             | 1              | ATAGGCTGACTCTAT              | 117                          | 9.21                   | Probable alkyl hydroperoxide reductase                    |
| PA4236              | <i>katA</i>       | 1.61         | 260             | 2              | ATTGATCTCGCTTAT              | 116                          | 7.35                   | Catalase                                                  |
| PA4613              | <i>katB</i>       | 0.53         | 30              | 2              | ATTGATATTCCTAAT              | 97                           | 7.26                   | Catalase                                                  |
| PA5344              | <i>oxyR</i>       | 0.92         | 6               | 1              |                              |                              |                        | OxyR                                                      |
| PA5345              | <i>recG</i>       | 1.59         | 738             | 1              |                              |                              |                        | ATP-dependent DNA helicase RecG                           |
| PA0291              | <i>oprE</i>       | 0.63         | 36              | 1              | ATTGGTATTGCTAAT              | 14                           | 7.29                   | Anaerobically-induced outer membrane porin OprE precursor |
| PA0962              | <i>dps</i>        | 1.02         | 107             | 1              | ATAGGGAGAATCTAT              | 107                          | 7.66                   | probable dna-binding stress protein                       |
| PA1289              |                   | 0.64         | 119             | 1              | AAAGCTGGAAACAAT              | 136                          | 6.70                   | Hypothetical protein                                      |
| PA1317              | <i>cyoA</i>       | 0.95         | 304             | 5              |                              |                              |                        | Cytochrome o ubiquinol oxidase subunit II                 |
| PA2146              |                   | 1.04         | 287             | 1              | ATCTTTGAACCCTAT              | 153                          | 7.02                   | Conserved hypothetical protein                            |
| PA2821              |                   | 0.55         | 7               | 1              | ATGAGCCTGGGTTAT              | 20                           | 6.44                   | Probable glutathione S-transferase                        |
| PA3237              |                   | 0.65         | 103             | 1              | ATCGAAGCGCTCTAT              | 93                           | 6.90                   | Hypothetical protein                                      |
| PA5240              | <i>trxA</i>       | 0.78         | 193             | 1              | ATAGAGACTCTCAAT              | 88                           | 7.25                   | Thioredoxin                                               |
| PA5436              |                   | 0.87         | -1              | 2              | ATAATTATTGATTTT              | 122                          | 6.52                   | Probable biotin carboxylase subunit of a transcarboxylase |
| PA3450              |                   | 0.52         | 6               | 1              | ATAAATTCAGATTTT              | 62                           | 6.60                   | Probable antioxidant protein                              |
| PA5319              | <i>radC</i>       | 0.98         | 89              | 1              |                              |                              |                        | DNA repair protein RadC                                   |
| PA1003              | <i>mvfR</i>       | 0.74         | 304             | 1              | ATATTTACCGGTTAT              | 364                          | 7.20                   | Transcriptional regulator MvfR                            |
| PA1159              |                   | 0.54         | 40              | 1              | ATGGCGGCTAGCTAT              | 290                          | 6.96                   | Probable cold-shock protein                               |
| PA1380              |                   | 0.65         | -12             | 1              |                              |                              |                        | Probable transcriptional regulator                        |
| PA2050              |                   | 1.27         | 202             | 2              | AAAAAGAATATTAAT              | 171                          | 6.26                   | Probable sigma-70 factor. ECF subfamily                   |

|          |              |      |     |   |                 |     |      |                                                        |
|----------|--------------|------|-----|---|-----------------|-----|------|--------------------------------------------------------|
| PA2054   | <i>cynR</i>  | 1.07 | 13  | 1 | ATTGGTCTGGTCTAT | 15  | 7.36 | Transcriptional regulator CynR                         |
| PA2258   | <i>ptxR</i>  | 0.61 | 261 | 1 | ATGGTTTGCAATTAT | 354 | 7.35 | Transcriptional regulator PtxR                         |
| PA2259   | <i>ptxS</i>  | 0.61 | 302 | 5 | ATGGTTTGCAATTAT | 195 | 7.35 | Transcriptional regulator PtxS                         |
| PA2359   |              | 0.54 | 82  | 1 | AATTTTTTAATCTAT | 49  | 6.64 | Probable transcriptional regulator                     |
| PA2426   | <i>pvdS</i>  | 0.71 | 272 | 1 | ATTGACAATCATTAT | 85  | 7.19 | Sigma factor PvdS                                      |
| PA2738   | <i>himA</i>  | 0.76 | 16  | 1 |                 |     |      | Integration host factor. alpha subunit                 |
| PA3135   |              | 1.22 | -1  | 2 | AAGTGTAGCGCCTAT | 31  | 6.09 | Probable transcriptional regulator                     |
| PA4902   |              | 0.66 | -12 | 1 | ATAGAACTGGTCTAT | 1   | 7.38 | Probable transcriptional regulator                     |
| PA5029   |              | 0.64 | 43  | 2 | ATAGGTTTATATGAT | 58  | 7.13 | Probable transcriptional regulator                     |
| PA5437   |              | 0.87 | 215 | 1 | ATAATTATTGATTTT | 78  | 6.52 | Probable transcriptional regulator                     |
| PA0717   |              | 1.23 | 306 | 3 | ATAGAGCAAGACTAT | 352 | 7.59 | Hypothetical protein of bacteriophage Pf1              |
| PA0984   |              | 0.52 | 14  | 1 | ATTTCTAACACGAT  | 70  | 6.71 | colicin immunity protein                               |
| PA1249   | <i>aprA</i>  | 0.57 | 264 | 1 | AACGGTTTTTATAAT | 225 | 6.25 | Alkaline metalloproteinase precursor                   |
| PA1423   | <i>bdlA</i>  | 0.77 | 228 | 1 | ATATTTCCGACGAAT | 213 | 6.81 | BdlA                                                   |
| PA2425   | <i>pvdG</i>  | 0.71 | 260 | 2 | ATCGCTATCGCCGAT | 255 | 6.80 | PvdG                                                   |
| PA3064   | <i>pelA</i>  | 0.65 | 298 | 7 |                 |     |      | PelA                                                   |
| PA5241   | <i>ppx</i>   | 0.78 | -9  | 1 | ATAGAGACTCTCAAT | 82  | 7.25 | Exopolyphosphatase                                     |
| PA0714.1 | <i>phrD</i>  | 0.60 |     | 1 |                 |     |      | PhrD RNA                                               |
| PA0976.1 |              | 0.88 |     | 1 |                 |     |      | tRNA-Lys                                               |
| PA1030.1 |              | 0.79 |     | 1 |                 |     |      |                                                        |
| PA3621.1 | <i>rsmZ</i>  | 0.57 |     | 1 |                 |     |      | Regulatory RNA RsmZ                                    |
| PA4406.1 |              | 1.27 |     | 1 |                 |     |      | sRNA                                                   |
| PA4581.1 |              | 0.55 |     | 1 |                 |     |      | tRNA-Arg                                               |
| PA0185   |              | 0.83 | 141 | 3 | ATTTTTATTATTAT  | 170 | 7.35 | Probable permease of ABC transporter                   |
| PA0186   |              | 0.83 | 126 | 1 | ATTTTTATTATTAT  | 83  | 7.35 | Probable binding protein component of ABC transporter  |
| PA0195   | <i>pntAA</i> | 1.17 | 289 | 1 | ATTAAAAACATTAAT | 354 | 6.81 | Putative NAD(P) transhydrogenase. subunit alpha part 1 |
| PA0326   |              | 0.59 | 103 | 4 | ATAGATGCGCCAAT  | 111 | 7.37 | Probable ATP-binding                                   |

|        |              |      |     |   |                 |     |      |                                                    |
|--------|--------------|------|-----|---|-----------------|-----|------|----------------------------------------------------|
|        |              |      |     |   |                 |     |      | component of ABC transporter                       |
| PA0584 | <i>cca</i>   | 0.62 | 23  | 1 |                 |     |      | tRNA nucleotidyl transferase                       |
| PA0903 | <i>alaS</i>  | 1.42 | 106 | 1 | ATAGTTATTGCCTAT | 92  | 7.77 | Alanyl-tRNA synthetase                             |
| PA0945 | <i>purM</i>  | 0.56 | 5   | 3 |                 |     |      | phosphoribosylaminoimidazole synthetase            |
| PA0963 | <i>aspS</i>  | 1.02 | 304 | 2 | ATAGGGAGAATCTAT | 319 | 7.66 | aspartyl-tRNA synthetase                           |
| PA1004 | <i>nadA</i>  | 0.74 | 297 | 1 | ATATTTACCGTTAT  | 370 | 7.20 | Quinolinate synthetase A                           |
| PA1054 |              | 1.48 | 271 | 6 | ATAGATTGCGATAAT | 138 | 7.45 | Probable NADH dehydrogenase                        |
| PA1073 | <i>braD</i>  | 0.63 | 108 | 4 |                 |     |      | Branched-chain amino acid transport protein BraD   |
| PA1493 | <i>cysP</i>  | 0.68 | 123 | 1 | ATAACGTCGGGTTAT | 38  | 6.74 | Sulfate-binding protein of ABC transporter         |
| PA1507 |              | 0.54 | 218 | 1 | ATCGATTTTTGTAT  | 152 | 7.13 | Probable transporter                               |
| PA1541 |              | 1.20 | 308 | 2 | ATCGATTGGCTTTTT | 237 | 6.36 | Probable drug efflux transporter                   |
| PA2015 | <i>liuA</i>  | 0.52 | 6   | 5 |                 |     |      | Putative isovaleryl-CoA dehydrogenase              |
| PA2042 |              | 0.52 | 302 | 1 |                 |     |      | Probable transporter (membrane subunit)            |
| PA2053 | <i>cynT</i>  | 1.07 | 102 | 2 | ATTGGTCTGGTCTAT | 86  | 7.36 | Carbonate dehydratase                              |
| PA2165 |              | 0.64 | 130 | 6 | ATTGATATTTGCAAT | 223 | 7.30 | Probable glycogen synthase                         |
| PA2975 | <i>rluC</i>  | 0.65 | -2  | 3 | ATTGAAGCACTTAAT | 28  | 6.94 | Ribosomal large subunit pseudouridine synthase C   |
| PA3000 | <i>aroP1</i> | 0.65 | 101 | 1 |                 |     |      | Aromatic amino acid transport protein AroP1        |
| PA3032 | <i>snr1</i>  | 1.34 | 282 | 2 | ATAGACTCAGGCTAT | 201 | 7.53 | Cytochrome c Snr1                                  |
| PA3136 |              | 1.22 | 71  | 2 | AAGTGTAGCGCCTAT | 25  | 6.09 | Probable secretion protein                         |
| PA3236 |              | 0.65 | 191 | 1 | ATCGAAGCGCTCTAT | 187 | 6.90 | Probable glycine betaine-binding protein precursor |
| PA3452 | <i>mqaA</i>  | 0.55 | 150 | 1 | ATAAGTTCGGTGAAT | 341 | 8.34 | Malate:quinone oxidoreductase                      |
| PA3768 |              | 0.62 | 108 | 2 | AATGAGAAAATCTAT | 38  | 6.78 | Probable metallo-oxidoreductase                    |
| PA4251 | <i>rplE</i>  | 0.56 | 12  | 2 |                 |     |      | 50S ribosomal protein L5                           |
| PA4267 | <i>rpsG</i>  | 0.60 | 0   | 3 | ATATAAAAACGCTAT | 86  | 7.16 | 30S ribosomal protein S7                           |

|        |             |      |     |   |                 |     |      |                                                                                           |
|--------|-------------|------|-----|---|-----------------|-----|------|-------------------------------------------------------------------------------------------|
| PA4268 | <i>rpsL</i> | 1.23 | 76  | 1 | ATAGCTCCACTGATT | 3   | 6.17 | 30S ribosomal protein S12                                                                 |
| PA4406 | <i>lpxC</i> | 1.27 | 123 | 1 | ACTGTTTTCAACAAT | 30  | 6.50 | UDP-3-O-acyl-N-acetylglucosamine deacetylase                                              |
| PA4524 | <i>nadC</i> | 0.59 | 21  | 1 | ATCTCTATAATGAAT | 157 | 6.87 | Nicotinate-nucleotide pyrophosphorylase                                                   |
| PA4614 | <i>mscL</i> | 0.53 | 117 | 1 | ATTTCTTTTTACGAT | 391 | 6.54 | Conductance mechanosensitive channel                                                      |
| PA4901 | <i>mdlC</i> | 0.66 | 113 | 1 | ATAGAACTGGTCTAT | 86  | 7.38 | Benzoylformate decarboxylase                                                              |
| PA5030 |             | 0.64 | 133 | 1 | ATAGGTTTATATGAT | 104 | 7.13 | Probable major facilitator superfamily (MFS) transporter                                  |
| PA5170 | <i>arcD</i> | 0.60 | 256 | 4 | ATCGTTGATGCCGAT | 265 | 6.87 | Arginine/ornithine antiporter                                                             |
| PA5291 |             | 1.36 | 103 | 1 | ATCGTGATAGCTAAT | 64  | 7.12 | Probable choline transporter                                                              |
| PA5320 | <i>coaC</i> | 0.98 | 51  | 2 |                 |     |      | Phosphopantothenoyl cysteine synthase/(R)-4'-phospho-N-pantothenoylcysteine decarboxylase |
| PA5370 |             | 0.53 | 16  | 1 | ATTGTTCTCTTTATT | 7   | 6.18 | Probable major facilitator superfamily (MFS) transporter                                  |
| PA5312 |             | 0.66 | 2   | 1 |                 |     |      | Probable aldehyde dehydrogenase                                                           |
| PA0049 |             | 0.69 | 312 | 1 | ATAGGAAAAGTTGAT | 364 | 7.02 | Hypothetical protein                                                                      |
| PA0050 |             | 0.69 | 236 | 1 | ATAGGAAAAGTTGAT | 232 | 7.02 | Hypothetical protein                                                                      |
| PA0197 |             | 0.56 | 191 | 3 | AATTATTTTTGTTAT | 106 | 6.20 | Hypothetical protein                                                                      |
| PA0327 |             | 0.59 | 225 | 1 | ATAGATGCGCCAAT  | 203 | 7.37 | Hypothetical protein                                                                      |
| PA0716 |             | 0.83 | -2  | 1 | ATAAACTACGTAAAT | 93  | 8.43 | Hypothetical protein                                                                      |
| PA0776 |             | 0.68 | 79  | 1 |                 |     |      | Hypothetical protein                                                                      |
| PA0861 |             | 0.53 | 295 | 2 | ATTGCCGCAGCCAAT | 220 | 6.94 | Hypothetical protein                                                                      |
| PA0938 |             | 1.27 | 16  | 1 | ATCATCGGTAGTTAT | 96  | 6.67 | Hypothetical protein                                                                      |
| PA0939 |             | 0.53 | 9   | 1 |                 |     |      | Hypothetical protein                                                                      |
| PA0946 |             | 0.56 | 209 | 1 |                 |     |      | hypothetical protein                                                                      |
| PA0990 |             | 0.52 | 164 | 1 |                 |     |      | conserved hypothetical protein                                                            |
| PA0991 |             | 0.52 | 301 | 1 | AGAGGCGGAGGCAAT | 134 | 6.25 | hypothetical protein                                                                      |
| PA1198 |             | 0.67 | 76  | 2 | ATTTGCCTTCTCGAT | 33  | 6.23 | Conserved hypothetical protein                                                            |
| PA1383 |             | 0.58 | 293 | 1 | ATGGCTTTATATAAT | 200 | 7.09 | Hypothetical protein                                                                      |
| PA1424 |             | 0.77 | 68  | 1 | ATATTTCCGACGAAT | 69  | 6.81 | Hypothetical protein                                                                      |
| PA1656 |             | 0.86 | 296 | 4 | AGCTCTTCAGACTAT | 85  | 6.26 | Hypothetical protein                                                                      |
| PA2044 |             | 1.25 | 101 | 1 | ATTGATAAAACCTAT | 95  | 7.84 | Hypothetical protein                                                                      |
| PA2145 |             | 1.04 | 8   | 1 | ATAGACCCATTCAAT | 38  | 7.23 | Hypothetical protein                                                                      |

|        |  |      |     |   |                  |     |      |                                   |
|--------|--|------|-----|---|------------------|-----|------|-----------------------------------|
| PA2166 |  | 0.64 | 238 | 1 | ATTGATATTTGCAAT  | 131 | 7.30 | Hypothetical protein              |
| PA2228 |  | 0.72 | 5   | 3 | ATAGATTCAGTCTTT  | 363 | 7.04 | Hypothetical protein              |
| PA2229 |  | 0.72 | 291 | 2 | ATAGAGAGTACTAAT  | 371 | 7.37 | Conserved<br>hypothetical protein |
| PA2594 |  | 0.58 | 122 | 1 | ATAGATTATTTGAAT  | 69  | 7.22 | Conserved<br>hypothetical protein |
| PA2595 |  | 1.13 | 8   | 1 |                  |     |      | Conserved<br>hypothetical protein |
| PA2610 |  | 0.70 | 79  | 1 | ATCGATCTGATCGAT  | 83  | 8.55 | Conserved<br>hypothetical protein |
| PA2935 |  | 0.56 | 85  | 1 | ATCAAACGTATTTAT  | 41  | 6.83 | Hypothetical protein              |
| PA2936 |  | 0.56 | 25  | 1 | ATCAAACGTATTTAT  | 55  | 6.83 | Hypothetical protein              |
| PA3261 |  | 0.75 | -7  | 1 |                  |     |      | Hypothetical protein              |
| PA3286 |  | 0.57 | 215 | 2 |                  |     |      | Hypothetical protein              |
| PA3287 |  | 0.57 | 285 | 1 |                  |     |      | Conserved<br>hypothetical protein |
| PA3340 |  | 0.72 | 196 | 1 | ATGGCTTTTTGCTAT  | 119 | 7.14 | Hypothetical protein              |
| PA3446 |  | 0.59 | 46  | 1 | ATAAAAAACATTTAT  | 89  | 7.16 | Conserved<br>hypothetical protein |
| PA3483 |  | 0.79 | 3   | 1 |                  |     |      | Hypothetical protein              |
| PA4523 |  | 0.59 | 265 | 1 | ATCTCTATAATGAAT  | 115 | 6.87 | Hypothetical protein              |
| PA5180 |  | 0.61 | 35  | 2 | ATCGACGTGATCTAT  | 83  | 7.19 | Conserved<br>hypothetical protein |
| PA5205 |  | 0.52 | 74  | 1 | TTTGAAAAAACTAT   | 95  | 6.35 | Conserved<br>hypothetical protein |
| PA5545 |  | 0.60 | 28  | 1 |                  |     |      | Conserved<br>hypothetical protein |
| PA5546 |  | 0.79 | 204 | 1 | ATAGCAAACACTCTAT | 48  | 7.39 | Conserved<br>hypothetical protein |
| PA5547 |  | 0.79 | 34  | 1 | ATAGCAAACACTCTAT | 176 | 7.39 | Conserved<br>hypothetical protein |

| Table S2. EMSA analyses of partial OxyR regulon in <i>P. aeruginosa</i> |             |                                              |      |                    |
|-------------------------------------------------------------------------|-------------|----------------------------------------------|------|--------------------|
| PA no.                                                                  | Gene        | Gene product                                 | EMSA | Upstream DNA motif |
| <b>Positive control</b>                                                 |             |                                              |      |                    |
| PA0139                                                                  | <i>ahpC</i> | Alkyl hydroperoxide reductase subunit C      | +    | ATAGATTTAGATAAT    |
| <b>Negative control</b>                                                 |             |                                              |      |                    |
| PA4764                                                                  | <i>fur</i>  | Ferric uptake regulation protein             | -    | -                  |
| <b>Tested targets</b>                                                   |             |                                              |      |                    |
| PA0717                                                                  | <i>pf4</i>  | Hypothetical protein of bacteriophage Pf1    | ++   | ATAGAGCAAGACTAT    |
| PA0938                                                                  |             | Hypothetical protein                         | +    | ATCATCGGTAGTTAT    |
| PA0962                                                                  | <i>dps</i>  | probable DNA-binding stress protein          | ++   | ATAGGGAGAATCTAT    |
| PA1003                                                                  | <i>mvfR</i> | Transcriptional regulator MvfR               | -    | ATATTTACCGGTTAT    |
| PA1423                                                                  | <i>bdlA</i> | BdIA                                         | ++   | ATATTTCCGACGAAT    |
| PA1431                                                                  | <i>rsaL</i> | RsaL                                         | +    | ATTCATAATTTTAT     |
| PA1541                                                                  |             | Probable drug efflux transporter             | +    | ATCGATTGGCTTTTT    |
| PA2145                                                                  |             | Hypothetical protein                         | +    | ATAGACCCATTCAAT    |
| PA2426                                                                  | <i>pvdS</i> | Sigma factor PvdS                            | ++   | ATTGACAATCATTAT    |
| PA2738                                                                  | <i>himA</i> | Integration host factor, alpha subunit       | -    | -                  |
| PA3032                                                                  | <i>snr1</i> | Cytochrome c Snr1                            | ++   | ATAGACTCAGGCTAT    |
| PA4268                                                                  | <i>rpsL</i> | 30S ribosomal protein S12                    | +    | ATAGCTCCACTGATT    |
| PA4406                                                                  | <i>lpxC</i> | UDP-3-O-acyl-N-acetylglucosamine deacetylase | ++   | ACTGTTTTCAACAAT    |
| PA4406.1                                                                |             | sRNA                                         | ++   | ATTGTTGAAAACAGT    |
| PA5240                                                                  | <i>trxA</i> | Thioredoxin                                  | ++   | ATAGAGACTCTCAAT    |
| PA5319                                                                  | <i>radC</i> | DNA repair protein RadC                      | -    | -                  |
| PA5344                                                                  | <i>oxyR</i> | OxyR                                         | -    | -                  |
| PA5345                                                                  | <i>recG</i> | ATP-dependent DNA helicase RecG              | -    | -                  |
|                                                                         |             |                                              |      |                    |

Table S3. Potential OxyR binding sites in other bacteria on the basis of OxyR motif in *P. aeruginosa*

| Bacterial species <sup>a</sup>                   | Gene <sup>a</sup>  | Motif <sup>a</sup> | PWM Score <sup>a</sup> | Conserved motif <sup>b</sup> |
|--------------------------------------------------|--------------------|--------------------|------------------------|------------------------------|
| <b>1. <i>Bacillus subtilis</i> strain 168</b>    | <b><i>katA</i></b> | AATAGTTATCTCTAT    | 7.95                   |                              |
|                                                  | <b><i>trxA</i></b> | AATGGGAGATGCTAT    | 8.06                   |                              |
|                                                  | <b><i>alsS</i></b> | ATAAGGCGAATCGAT    | 8.63                   |                              |
|                                                  | <b><i>alsR</i></b> | ATAAGGCGAATCGAT    | 8.63                   |                              |
|                                                  | <b><i>katX</i></b> | AAAGGAGAGGTCGAT    | 8.48                   |                              |
|                                                  | <b><i>ahpC</i></b> | ATAGCTAGAAACAAT    | 8.85                   |                              |
| <b>2. <i>Escherichia coli</i> K12</b>            | <b><i>cyoA</i></b> | ATTGGTATAACCAAT    | 8.5                    |                              |
|                                                  | <b><i>hemH</i></b> | AAAGGCCGAATGAAT    | 8.04                   |                              |
|                                                  | <b><i>dsbG</i></b> | AAAGGCATAACCTAT    | 8.76                   |                              |
|                                                  | <b><i>ahpC</i></b> | AAAGGCATAACCTAT    | 8.76                   |                              |
|                                                  | <b><i>fur</i></b>  | ATTGGCATTATCTAT    | 8.86                   |                              |
|                                                  | <b><i>dps</i></b>  | ATTGTTCTTATCAAT    | 8.73                   |                              |
|                                                  | <b><i>grxA</i></b> | ATAGCTTTTAGCAAT    | 8.84                   |                              |
|                                                  | <b><i>trxB</i></b> | ATCGGCAGCATCGAT    | 8.32                   |                              |
|                                                  | <b><i>fhuF</i></b> | ATAGGTTTACCCGAT    | 8.7                    |                              |
|                                                  | <b><i>rpsL</i></b> | AAAACCAGGAGCTAT    | 8.22                   |                              |
|                                                  | <b><i>trxA</i></b> | ATATCAGCTTACTAT    | 8.18                   |                              |
|                                                  | <b><i>sodA</i></b> | ATAATCATTTTCAAT    | 8.66                   |                              |
|                                                  | <b><i>oxyR</i></b> | ATAGCAATGAACGAT    | 8.65                   |                              |
|                                                  | <b><i>trxC</i></b> | AAAGCCTGCGACTAT    | 8.34                   |                              |
|                                                  | <b><i>ansP</i></b> | AATGGTGATAACTAT    | 8.18                   |                              |
|                                                  | <b><i>ybaL</i></b> | ATAGTTTATGACAAT    | 8.67                   |                              |
|                                                  | <b><i>yhjA</i></b> | ATAGGCACAGGCTAT    | 8.82                   |                              |
|                                                  | <b><i>sufA</i></b> | ATAGTCATTTTCAAT    | 8.93                   |                              |
|                                                  | <b><i>flu</i></b>  | ATAGAATAAAACGAT    | 8.79                   |                              |
|                                                  | <b><i>elbA</i></b> | ATAAATATGCTCGAT    | 8.57                   |                              |
| <b><i>ydeK</i></b>                               | AATAAGAATAACTAT    | 7.95               |                        |                              |
| <b><i>yceA</i></b>                               | ATAGCAATTATCGAT    | 9.03               |                        |                              |
| <b>3. <i>Erwinia carotovora</i> ATCC BAA-672</b> | <b><i>fur</i></b>  | AAAGGTTTTACCTAT    | 8.72                   |                              |
|                                                  | <b><i>katB</i></b> | ATCAGGTTAAGCTAT    | 8.12                   |                              |
|                                                  | <b><i>grxB</i></b> | ATTGTTTGAATGTAT    | 8.08                   |                              |
|                                                  | <b><i>grxA</i></b> | ATTGGCTTAGCCAAT    | 8.33                   |                              |
|                                                  | <b><i>dps</i></b>  | AAAAGAATTACCTAT    | 8.37                   |                              |

|             |                 |      |
|-------------|-----------------|------|
| <b>ahpF</b> | AAAGTCGGGTGCAAT | 8.08 |
| <b>ahpC</b> | ATTGGTGATAGCGAT | 8.25 |
| <b>oxyR</b> | ATAGCTAACAGCGAT | 8.62 |

**4. Pseudomonas entomophila L48**

|               |                 |      |
|---------------|-----------------|------|
| <b>katA</b>   | ATAGATATTTTCAAT | 9.15 |
| <b>trxB</b>   | ATAGGCAGTCTCTAT | 9.1  |
| <b>ahpC</b>   | ATAGCCAAAACCAAT | 8.98 |
| <b>katG</b>   | ATCGATGCCATCGAT | 8.39 |
| <b>katB</b>   | ATAAAAGTTACCAAT | 8.84 |
| <b>cynT-1</b> | AAAAGTCTCATTAT  | 8.49 |
| <b>cynR</b>   | AAAAGTCTCATTAT  | 8.49 |
| <b>alaS</b>   | ATAGAAACCGTCGAT | 8.7  |
| <b>trxA</b>   | ATAGTTACTCAAT   | 9.14 |
| <b>ppx</b>    | ATAGTTACTCAAT   | 9.14 |

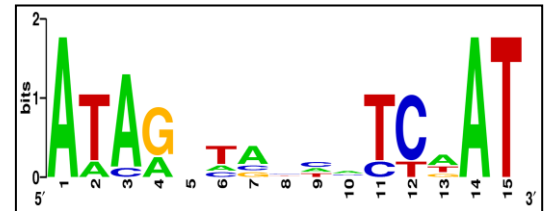

**5. P. aeruginosa PA7**

|             |                 |      |
|-------------|-----------------|------|
| <b>ahpC</b> | ATTATCTAAATCTAT | 9.23 |
| <b>oprE</b> | ATTAGCAATACCAAT | 8.41 |
| <b>katA</b> | AAAGTTTTTATCTAT | 9.48 |
| <b>cioA</b> | ATATTATTTGTTTAT | 8.51 |
| <b>cynR</b> | ATAGGTAGAACCAAT | 8.99 |
| <b>cynT</b> | ATAGGTAGAACCAAT | 8.99 |
| <b>rsaL</b> | AAAGATCAGAGCAAT | 8.5  |
| <b>lasI</b> | AAAGATCAGAGCAAT | 8.5  |
| <b>alaS</b> | ATAGGCAATAACTAT | 9.13 |

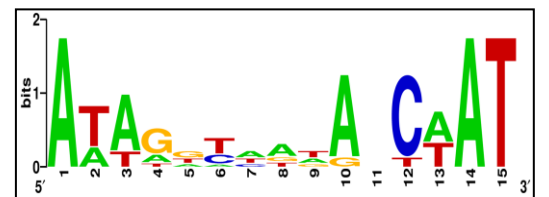

**6. P. aeruginosa PA14**

|             |                 |      |
|-------------|-----------------|------|
| <b>oprE</b> | ATTAGCAATACCAAT | 8.4  |
| <b>rpsG</b> | ATAGCGTTTTTATAT | 8.71 |
| <b>katA</b> | AAAGTTTTTATCTAT | 9.47 |
| <b>cioA</b> | AAAAATATTATTTAT | 8.98 |
| <b>snr1</b> | ATAGGCTCAGGCTAT | 8.72 |
| <b>ohr</b>  | AAATTAACGAACAAT | 8.18 |
| <b>pvdS</b> | ATAATGATTGTCAAT | 9.05 |
| <b>cynR</b> | ATAGGCCAGACCAAT | 8.69 |
| <b>cynT</b> | ATAGGCCAGACCAAT | 8.69 |
| <b>alaS</b> | ATAGGCAATAACTAT | 9.13 |
| <b>katB</b> | ATTAGGAATATCAAT | 8.87 |
| <b>recN</b> | AAATACTGTATAAAT | 8.41 |
| <b>trxA</b> | ATAGAGACTCTCAAT | 9.08 |

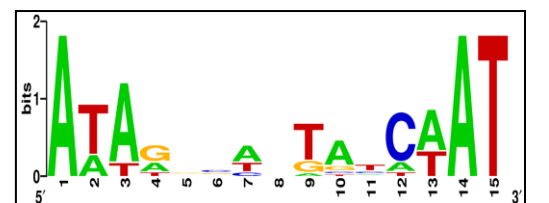



**7. *P. fluorescens* Pf5**      ***katG***    ATCAAGCGGGTCTAT      8.19

***trxB***    ATAGGCGGTCTCTAT      9  
***cynR***    ATAAGTACAGCCTAT      8.73  
***ahpC***    ATAGTCAAACCAAT      8.99  
***alaS***    ATACAAACAGTCAAT      8.15  
***cyoA***    AAAAGTGTACTGTAT      8.24  
***katA***    ATAGAAATATCCAAT      8.65  
***trxA***    ATAGTTAGAGTCAAT      9.07  
***oxyR***    ATAACGTGCGTCTAT      8.83

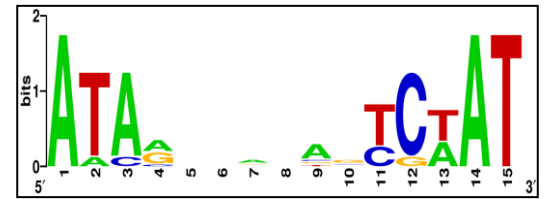

**8. *P. putida* KT2440**      ***cynT***    AAAGATTCAGGCTAT      8.55

***oprE***    ATAACCAAAGGTAT      8.34  
***katA***    ATAGAAATAACAAT      9.03  
***trxB***    ATAGGCGATGCCTAT      8.64  
***ahpC***    ATAGCCAAAACCAAT      8.96  
***ptxS***    ATATCAATGGCCTAT      8.24  
***cioA***    ATTGTTCTGTTTCGAT      8.26  
***recN***    AAAAAAGTACTGTAT      8.16  
***trx-2***    ATAGTTACACTCAAT      9.11  
***ppx***    ATAGTTACACTCAAT      9.11

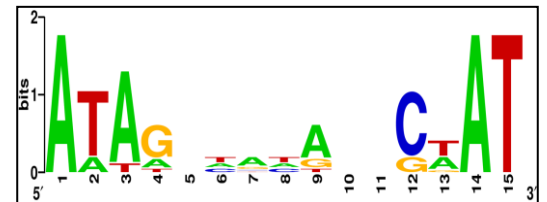

**9. *P. stutzeri* A1501**      ***katE***    ATTGAGCAAATCCAT      8.17

***ppx***    ATAGTCCTGGCGAT      8.38  
***katA***    AAAGAACTAATTTAT      8.79  
***lpxC***    ATAGTTTTCAACAAT      8.89  
***alaS***    ATTGCTTGATTCAAT      8.55  
***ahpC***    ATTGCTTTCATCTAT      8.97

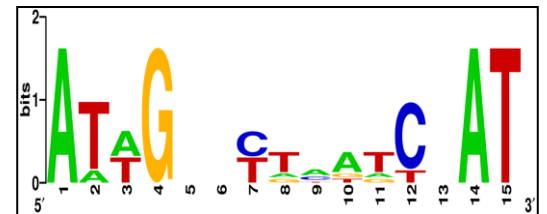

**10. *P. syringae* pathovar tomato DC3000**      ***trx-1***    AATGCCGCCAACTAT      8.02

***trxB***    ATAGGTCACCTTCTAT      8.93  
***cyoA***    ATAGTCATTAATAAAT      8.27  
***katB***    ATTAATAAATGTAT      8.18  
***trx-2***    ATAGCCAGAGTCAAT      8.96

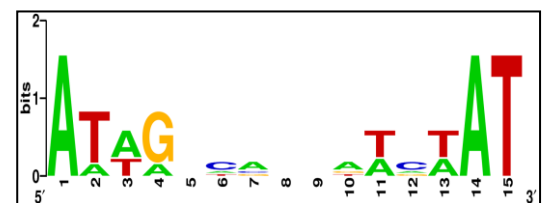

**11. Salmonella typhimurium LT2**

|                    |                 |      |
|--------------------|-----------------|------|
| <i>cyoA</i>        | ATTGGTATAACCAAT | 8.5  |
| <i>dsbG</i>        | AATGATGATGCCTAT | 8.03 |
| <i>fur</i>         | ATAGACAAGACCAAT | 8.8  |
| <i>dps</i>         | AAAAACCGGTGCTAT | 8.01 |
| <b><i>grxA</i></b> | ATAACCCAGGGCTAT | 8.38 |
| <b><i>txB</i></b>  | ATAGCATGAACCGAT | 8.75 |
| <b><i>trxC</i></b> | AAAGCTTGCGACTAT | 8.32 |
| <b><i>trxA</i></b> | ATATCAGCTTACTAT | 8.18 |
| <i>sodA</i>        | ATAATCATTTTCAAT | 8.68 |
| <b><i>katG</i></b> | AAAGGTATTAGCTAT | 8.65 |
| <i>oxyR</i>        | ATAGCAATGAACGAT | 8.63 |
| <i>hemH</i>        | AATGGCGCTAACGAT | 7.98 |
| <i>ybaL</i>        | ATAGTTTATGACAAT | 8.66 |
| <i>fhuF</i>        | ATAGCGATAAACGAT | 8.81 |
| <i>ansP</i>        | ATTGCGCAACGCAAT | 8.18 |
| <i>sufA</i>        | ATAGTCATTTTCTAT | 9.07 |
| <i>yceA</i>        | ATAATTAACAACAAT | 8.48 |

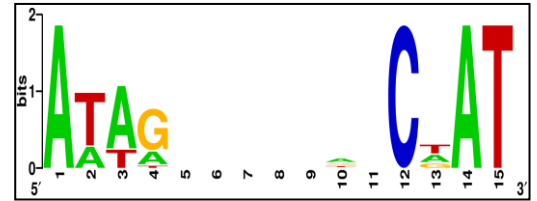

**12. Staphylococcus aureus Newman**

|                    |                 |      |
|--------------------|-----------------|------|
| <i>sodM</i>        | AAAGACAACCTCCAT | 8.26 |
| <b><i>ahpC</i></b> | AAAGTTGTGTCTAT  | 8.84 |
| <i>radA</i>        | AAAGATACCGACTAT | 8.78 |
| <i>alaS</i>        | ATTTACACATCCTAT | 8.02 |
| <i>hemA</i>        | ATATATACTAACAAT | 8.23 |
| <i>recX</i>        | AAAAAATCACACTAT | 8.09 |

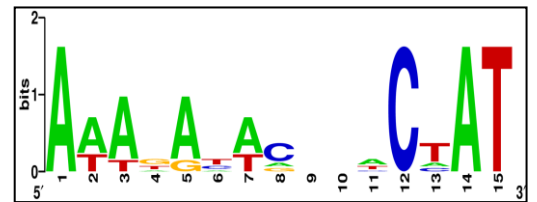

**13. Vibrio cholerae O359**

|                    |                 |      |
|--------------------|-----------------|------|
| <i>hemH</i>        | ATTTACCTATCAAT  | 8.13 |
| <i>Qrr</i>         | ATATGGCTAGGCTAT | 8.3  |
| <i>luxO</i>        | ATATGGCTAGGCTAT | 8.3  |
| <b><i>grxA</i></b> | ATAGATAAAAACAAT | 8.9  |
| <b><i>trxB</i></b> | ATAATTGGACTCGAT | 8.53 |
| <b><i>katB</i></b> | AAATTAGCTCTCTAT | 8.17 |
| <i>fur</i>         | ATAACAGAAGTCAAT | 8.56 |
| <i>recG</i>        | AAAACACAGCTCGAT | 8.13 |
| <b><i>trxA</i></b> | AAATAGATGCTCTAT | 8.19 |

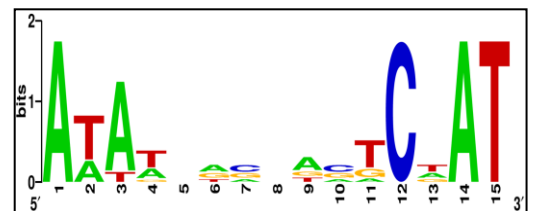

| <b>Table S4. Oligonucleotides used in this study.</b> |                          |                                        |                                                        |
|-------------------------------------------------------|--------------------------|----------------------------------------|--------------------------------------------------------|
| <b>PA no. <sup>a</sup></b>                            | <b>Gene <sup>a</sup></b> | <b>Forward primer (5'-3')</b>          | <b>Reverse primer (5'-3')</b>                          |
| <b>For OxyR expression in <i>E. coli</i></b>          |                          |                                        |                                                        |
| PA5344                                                | <i>oxyR</i>              | GGGAATTCATATGACCCTCA<br>CCGAACTGCGCTAC | CCCAAGCTTTGCTATTTGCGGTTGTTCTGG                         |
| <b>For OxyR expression in <i>P. aeruginosa</i></b>    |                          |                                        |                                                        |
| PA5344                                                | <i>oxyR</i>              | GGAATTCATGACCCTACCGA<br>ACTGCGCTAC     | GCTCTAGATCAGTGGTGGTGGTGGTGGTGTG<br>CTATTTGCGGTTGTTCTGG |
| <b>For EMSA analysis</b>                              |                          |                                        |                                                        |
| PA0139                                                | <i>ahpC</i>              | GACCATCCTGGTGCTGGTC                    | TGCCCTTCAGGGATTCTC                                     |
| PA0717                                                | <i>pf4</i>               | TTCCGTGCTCACGCGAATC                    | AGGTGCAAATCTCTACGAGGT                                  |
| PA0938                                                |                          | TGCTCAACGTACAGAGCCAG                   | AGGAAGGCATACCAACGTCC                                   |
| PA0962                                                | <i>dps</i>               | AATCCATGGCTTGCAGCCAG                   | AGGTAGAGGGTGTAGGTGTC                                   |
| PA1003                                                | <i>mvfR</i>              | GCGGATTCTAACCGCATAGG                   | CGATGACCTGGAGGAACATG                                   |
| PA1423                                                | <i>bdlA</i>              | ACGGCAAGGAGGGAATCAG                    | CGAGTTGCTGTTGCAAGTCG                                   |
| PA1431                                                | <i>rsaL</i>              | AGGTGTTCTTCAGCATGTAGG                  | AGTTTCTGGCTTTCCCGTC                                    |
| PA2145                                                |                          | ACATCTCGGAGGAGCACCAT<br>G              | GGAATCGCACTTCGTCACTG                                   |
| PA2426                                                | <i>pvdS</i>              | CGATAGCGATGTACGCCATG                   | ATCGACGAATGCCTGGAGGA                                   |
| PA2738                                                | <i>himA</i>              | CGAAGAACTCGACCTCGAG                    | TGACGATGTTCTGCGTCGTG                                   |
| PA3032                                                | <i>snr1</i>              | TTCCTCAGCTGCTGATGCCT                   | GTCAGTCTGAAGGGAAGCTC                                   |
| PA3841                                                | <i>exoS</i>              | GTGGATTCATGGCGTGTTC                    | CCTCAATCTGTCCAAACGC                                    |
| PA4268                                                | <i>rpsL</i>              | TCTGGCTTACCACAGCGAAC                   | ACGCACCAGCTGGTTGATAG                                   |
| PA4406                                                | <i>lpxC</i>              | AGCAGCAGTCGGTGAAGTAC                   | AGAACACGATACCGGTGTCC                                   |
| PA4406.1                                              |                          | AGCAGCAGTCGGTGAAGTAC                   | AGAACACGATACCGGTGTCC                                   |
| PA4764                                                | <i>fur</i>               | GCTGTCGTTGAAGAAGCAGGC                  | GCATCTGCAGGATCTTGACC                                   |
| PA5240                                                | <i>trxA</i>              | TTCCGTGAGATTGCGCTCCT                   | GTTGACGATATGTTGCGTCAAG                                 |
| PA5319                                                | <i>radC</i>              | CATCACCCTCGGACTTCAG                    | CCTGCTCCAGAAGCTTCTC                                    |
| PA5344                                                | <i>oxyR</i>              | TGTACACCAGGTAGTCGAGC                   | TAGCGCAGTTCGGTGAGGGT                                   |
| PA5345                                                | <i>recG</i>              | ACGAGCCCTTCTATGTGCTG                   | AGGATGTCTGCAGGGTTTC                                    |
| <b>For qRT-PCR analysis</b>                           |                          |                                        |                                                        |
| PA0139                                                | <i>ahpC</i>              | GCAAGTTCATCGAGGTGACC                   | CTTTCTGGAAGTTCGCGTAG                                   |
| PA0195                                                | <i>pntAA</i>             | CACCAGGTGATCGTCCAGAG                   | CGATGTTCTCGTTGTCGAAGG                                  |

|        |              |                                 |                       |
|--------|--------------|---------------------------------|-----------------------|
| PA0849 | <i>trxB2</i> | TCAAGCCGCTGCTGATCAC             | TCCACGGCATGAATGTGGTC  |
| PA0962 | <i>dps</i>   | TGTTCGAAGGCCAGTACACC            | TCCTCCTTGATGGACGACAG  |
| PA2426 | <i>pvdS</i>  | GCGTTCTTCAGGCTCCAGTC            | AGTTGATGTGCGAGGTTTCC  |
| PA2853 | <i>oprI</i>  | ATGAACAACGTTCTGAAATTC<br>TCTGCT | CTTGCGGCTGGCTTTTTCCAG |
